# Supplementary material for: High Content Screening Using New U2OS Reporter Cell Models Identifies Harmol Hydrochloride as a Selective and Competitive Antagonist of the Androgen Receptor
Source: PubMed Central journal article supplement (PMC7349874; doi:10.3390/cells9061469), 2020-06-16
Supplement: cells-09-01469-s001.pdf [file cells-09-01469-s001.pdf]

## SUPPLEMENTARY MATERIAL

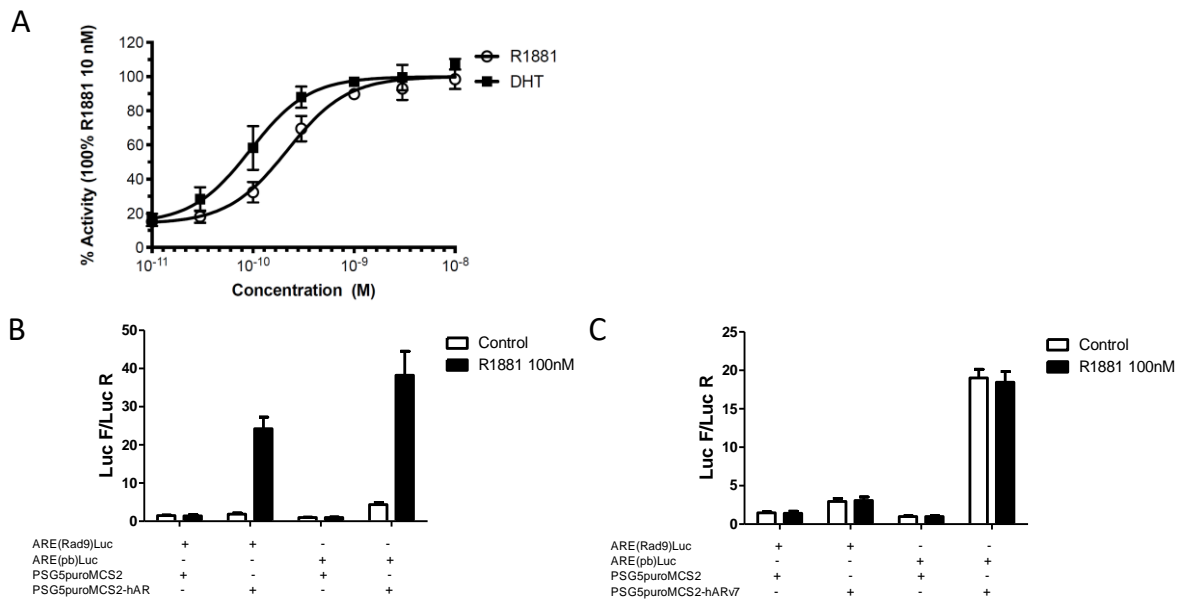

**Supplementary Figure S1. Choice of the AR responsive element and of the AR ligand for the screening assays** (A) Comparison of the agonist effect between DHT and R1881 in U2OS-hAR-ARE-Luc cells. Cells were treated with indicated concentrations of the androgens for 16h and AR transactivation was evaluated as described in Materials and Methods. (B, C) Comparison between the Rad9 and the probasin (PB) sequences of the AR responsive element (ARE) for the induction of AR transcriptional activity. U2OS cells were transiently transfected with a plasmid expressing hAR (B) or hARv7 (C), a Firefly luciferase reporter plasmid containing either the Rad9 or the PB ARE and a plasmid expressing the Renilla luciferase. The next day cells were incubated for 16 h in the presence of 100 nM R1881 and the luminescence was quantified. The results were expressed as ratios between the activity of the Firefly luciferase and the Renilla luciferase.

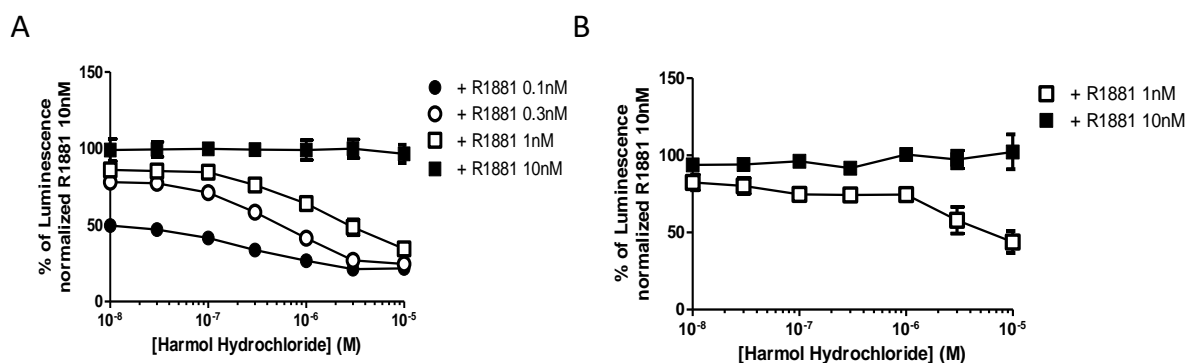

**Supplementary Figure S2. Harmol is a competitive antagonist of the full-length AR in PC3 and DU145 prostate cancer cells overexpressing AR.** (A) Dose response curves performed with harmol in PC3 cells stably overexpressing AR (PC3 hAR MMTV-luc) in the presence of increasing concentrations of R1881 (0.1, 0.3, 1, 10 nM) using the same transactivation assays as in Fig. 3. Results are the mean  $\pm$ SEM of two independent experiments performed in quadruplicate. (B) Same as in (A) using DU145 cells (5,000 cells/100 mm<sup>2</sup> dish) transiently co-transfected with 10  $\mu$ g of pSG5-hAR-Puro(R), 10  $\mu$ g of 6xARE-PB(-)-luc+-Hygro(R), and 5  $\mu$ g of the pRL-CMV Renilla plasmids using lipofectamine 2000. One day later, transactivation assays were conducted as described in Materials and Methods. Results are the mean of two independent experiments performed in quadruplicate and are expressed as ratios between the activity of the Firefly luciferase and the Renilla luciferase and normalized as % compared to cells treated with R1881 at 10nM

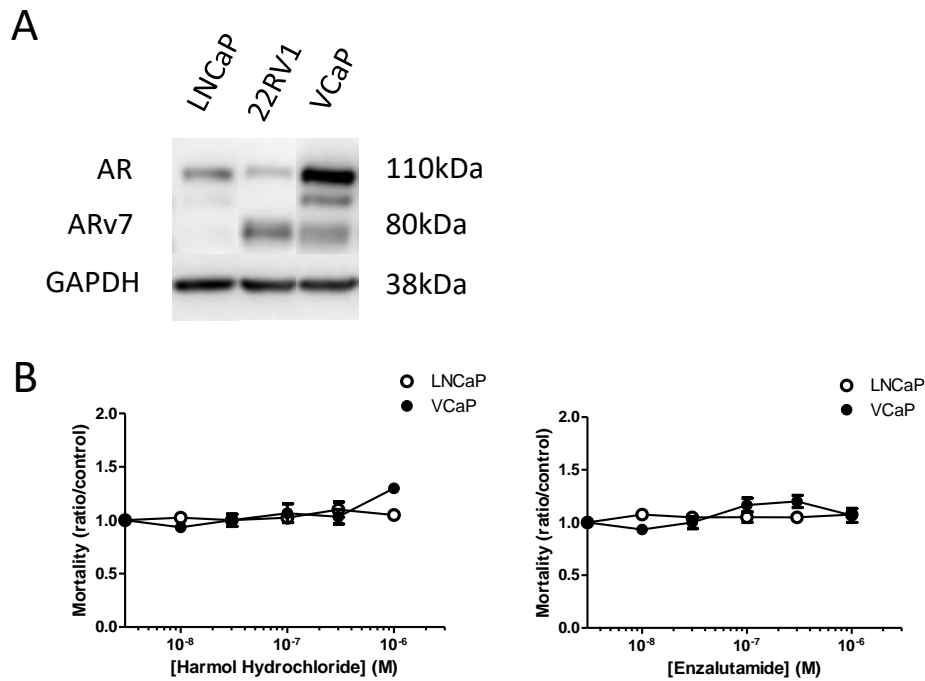

**Supplementary Figure S3. Harmol hydrochloride and enzalutamide are cytostatic. (A)** Western blots showing the basal expression of AR and ARv7 in LNCaP, VCaP and 22RV1 prostate cancer cells. GAPDH was used as a loading control. **(B)** Effects of Harmol hydrochloride and enzalutamide on cell death. Spheroids were treated for 7 days with the indicated concentrations of each drug, stained with PI (1 mg/mL) for 30 min and luminescence was evaluated using the Celigo® imaging system. Results are expressed as mortality ratios as compared to untreated spheroids (set at 1). Each point represents the mean  $\pm$  SEM of 3 independent experiments.

**A**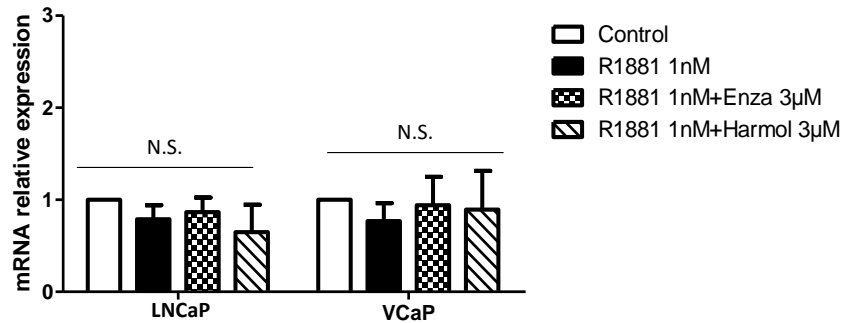**B**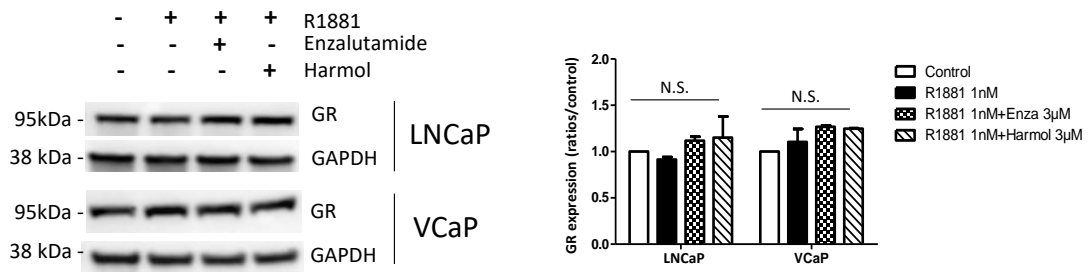**Supplementary Figure S4. Effects of Harmol and Enzalutamide on the expression of GR.**

LNCaP and VCaP cells were treated for 24h with 3 µM harmol hydrochloride or enzalutamide in the presence of 1 nM R1881 and GR expression was evaluated by RT-qPCR (n=3) (A) and by Western blotting (n=2) (B). Results are expressed as means ± SEM of mRNA or protein levels relative to untreated cells; N.S. Not significant.

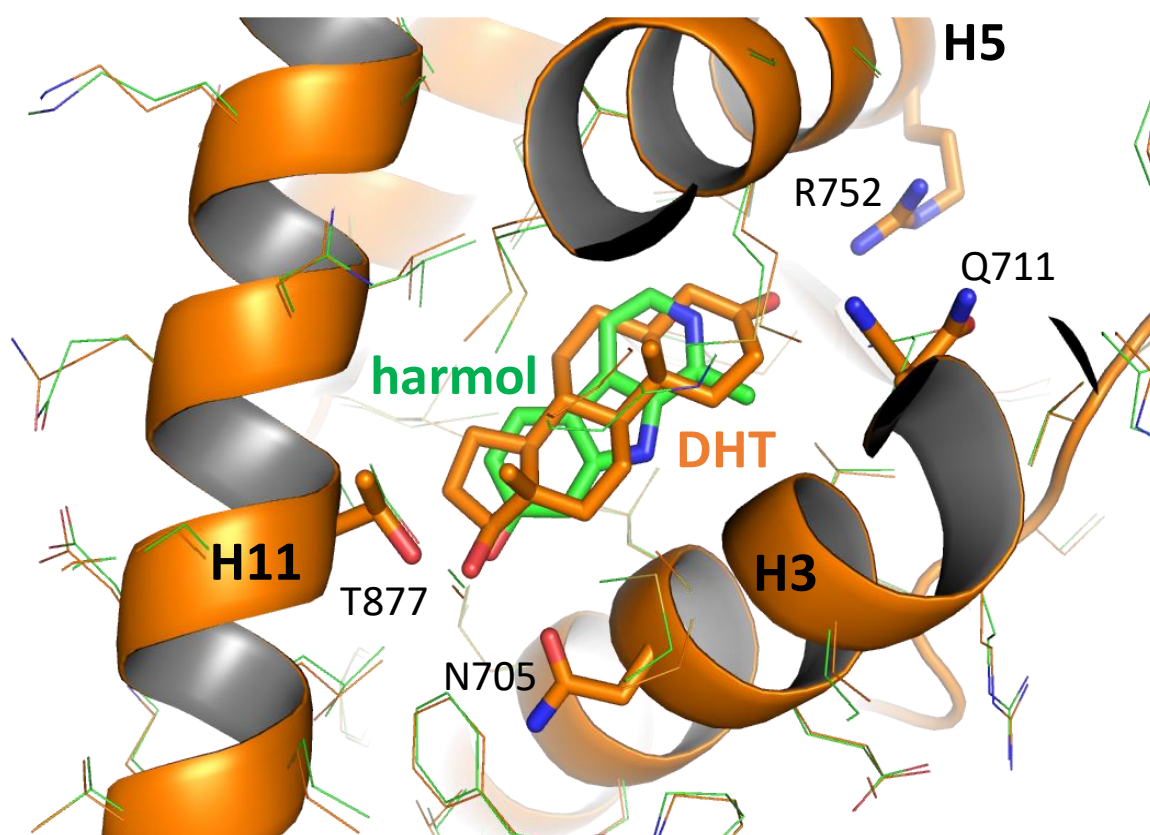

pKd 5.6

**Supplementary Figure S5. Modeling of harmol hydrochloride (in green) in the ligand binding pocket of AR.** For comparison, the model is superimposed on the crystal structure (PDB code 1T7R) of hAR bound to DHT (in orange). Some residues important for DHT binding are shown in stick representation and labeled. The predicted affinity of the interaction between harmol and hAR (pKd = 5.6) was obtained using the server EDMon (<http://edmon.cbs.cnrs.fr>).

**Supplementary Table S1. Results of the screening of the Prestwick Phytochemical Library using the U2OS-hAR-ARE-Luc cell model.** Positive hits were considered when tested compounds could reduce (or activate) AR-mediated transcriptional activity by more than 50% in a dose-dependent manner and had no or minor effect (<20%) in U2OS-ARE-Luc control cells.

| <b>Prestwick NAT number</b> | <b>Compound</b>   | <b>Results of 1st screen on AR (Results of confirmatory screen)</b> |
|-----------------------------|-------------------|---------------------------------------------------------------------|
| 0001                        | Aristolochic Acid | No effect                                                           |
| 0002                        | Astilbin          | No effect                                                           |
| 0003                        | Cardamonin        | No effect                                                           |
| 0004                        | Cimifugin         | No effect                                                           |
| 0005                        | Ellagic Acid      | No effect                                                           |
| 0006                        | Evodiamine        | No effect                                                           |
| 0007                        | Genistin          | No effect                                                           |
| 0008                        | Hesperidin        | No effect                                                           |
| 0009                        | Huperzine A       | No effect                                                           |
| 0010                        | Indirubin         | No effect                                                           |
| 0011                        | Jervine           | No effect                                                           |
| 0012                        | Matrine           | No effect                                                           |
| 0013                        | Rutaecarpine      | No effect                                                           |
| 0014                        | Rutin             | No effect                                                           |
| 0015                        | Salicin           | No effect                                                           |
| 0016                        | Strychnine        | No effect                                                           |
| 0017                        | Acacetin          | No effect                                                           |
| 0018                        | Berlambine        | No effect                                                           |
| 0019                        | Betulinic acid    | No effect                                                           |

|      |                               |                            |
|------|-------------------------------|----------------------------|
| 0022 | Eleagnine hydrochloride (R,S) | No effect                  |
| 0023 | Betonicine                    | No effect                  |
| 0024 | Myosmine                      | No effect                  |
| 0025 | Methoxy-6-harmalan            | No effect                  |
| 0026 | Norharman                     | No effect                  |
| 0027 | Piperlongumine                | No effect                  |
| 0028 | Rotenone                      | No effect                  |
| 0029 | Apigenin                      | No effect                  |
| 0030 | Anisomycin                    | No effect                  |
| 0031 | Genistein                     | No effect                  |
| 0032 | Pyridostigmine bromide        | No effect                  |
| 0033 | Kaempferol                    | No effect                  |
| 0034 | Angelicin                     | No effect                  |
| 0035 | Baicalin                      | No effect                  |
| 0036 | Cynarin                       | No effect                  |
| 0037 | Glycitin                      | No effect                  |
| 0038 | Oxymatrine                    | No effect                  |
| 0039 | Trigonelline hydrochloride    | No effect                  |
| 0040 | 2,6-Pyridinedicarboxylic Acid | No effect                  |
| 0043 | Evoxine                       | No effect                  |
| 0046 | Lycorine HCl                  | No effect                  |
| 0048 | Pinoembrine                   | No effect                  |
| 0049 | Remerine HCl                  | Inhibition (Not confirmed) |
| 0050 | Stevioside                    | No effect                  |
| 0051 | Unsevine                      | No effect                  |
| 0052 | Lapachol                      | No effect                  |

|      |                                                  |                           |
|------|--------------------------------------------------|---------------------------|
| 0053 | 1,8-Dihydroxy-3-methylanthraquinone              | No effect                 |
| 0055 | 4,4'-(2,3-Dimethyltetramethylene)dipyrrocatechol | No effect                 |
| 0056 | Xanthurenic Acid                                 | No effect                 |
| 0058 | 2-Hydroxy-[1,4]naphthoquinone                    | No effect                 |
| 0059 | Honokiol                                         | Inhibition(Not confirmed) |
| 0060 | Isoliquiritigenin                                | No effect                 |
| 0061 | Kinetin riboside                                 | No effect                 |
| 0062 | Curcumin                                         | No effect                 |
| 0063 | beta-lapachone                                   | No effect                 |
| 0064 | Precocene 2                                      | No effect                 |
| 0065 | (+/-)-2-cis-4-trans-Abscisic acid                | No effect                 |
| 0066 | Mahanimbine                                      | No effect                 |
| 0067 | Abietic Acid                                     | No effect                 |
| 0068 | Roseoflavin                                      | No effect                 |
| 0069 | Cotinine (-)                                     | No effect                 |
| 0070 | Ursolic acid                                     | No effect                 |
| 0071 | R(-) Apomorphine hydrochloride hemihydrate       | No effect                 |
| 0072 | Tomatine                                         | No effect                 |
| 0073 | Bromocryptine mesylate                           | No effect                 |
| 0074 | Hesperetin                                       | No effect                 |
| 0075 | Erythromycin                                     | No effect                 |
| 0076 | Catharanthine                                    | No effect                 |
| 0077 | Hydrastinine hydrochloride                       | No effect                 |
| 0078 | Camptothecine (S,+)                              | Activation                |



|      |                                     |                           |
|------|-------------------------------------|---------------------------|
| 0079 | Kawain                              | No effect                 |
| 0080 | Hyoscyamine (L)                     | No effect                 |
| 0081 | Vinpocetine                         | No effect                 |
| 0082 | Vincamine                           | No effect                 |
| 0083 | Quinidine hydrochloride monohydrate | No effect                 |
| 0084 | Colchicine                          | No effect                 |
| 0085 | Mimosine                            | No effect                 |
| 0086 | Etoposide                           | No effect                 |
| 0087 | Arecoline hydrobromide              | No effect                 |
| 0088 | Tocopherol (R,S)                    | No effect                 |
| 0089 | Aspartic acid, N-acetyl (R,S)       | No effect                 |
| 0090 | Biotin                              | No effect                 |
| 0091 | Calciferol                          | No effect                 |
| 0092 | Carcinine                           | No effect                 |
| 0093 | Chlorogenic acid                    | No effect                 |
| 0094 | Coralyne chloride hydrate           | No effect                 |
| 0095 | Digitoxigenin                       | Inhibition(Not confirmed) |
| 0096 | Fusaric acid                        | No effect                 |
| 0097 | Ginkgolide A                        | No effect                 |
| 0098 | Pilocarpine nitrate                 | No effect                 |
| 0099 | Lactobionic acid                    | No effect                 |
| 0100 | Lysergol                            | Activation                |
| 0101 | Menadione                           | No effect                 |
| 0102 | Muramic acid, N-acetyl              | No effect                 |
| 0103 | Myricetin                           | No effect                 |

|      |                                           |                            |
|------|-------------------------------------------|----------------------------|
| 0104 | Naringenine                               | No effect                  |
| 0105 | Naringin hydrate                          | No effect                  |
| 0106 | Neostigmine bromide                       | No effect                  |
| 0107 | Strophantine octahydrate                  | Inhibition (Not confirmed) |
| 0109 | Piperine                                  | No effect                  |
| 0110 | Methoxy-8-psoralen                        | No effect                  |
| 0111 | Puromycin dihydrochloride                 | No effect                  |
| 0112 | Azathymine, 6                             | No effect                  |
| 0113 | Artemisinin                               | No effect                  |
| 0114 | Quercetine dihydrate                      | No effect                  |
| 0115 | Resveratrol                               | No effect                  |
| 0116 | Glycocholic acid                          | No effect                  |
| 0117 | Methionine sulfoximine (L)                | No effect                  |
| 0118 | Thiocolchicoside                          | No effect                  |
| 0119 | Parthenolide                              | No effect                  |
| 0120 | Mycophenolic acid                         | No effect                  |
| 0121 | Tubocurarine chloride pentahydrate<br>(+) | No effect                  |
| 0122 | Dihydroergocristine mesylate              | No effect                  |
| 0123 | Noscapine                                 | No effect                  |
| 0124 | Syrosingopine                             | No effect                  |
| 0125 | Atropine sulfate monohydrate              | No effect                  |
| 0126 | Eserine sulfate, physostigmine<br>sulfate | No effect                  |
| 0127 | Aconitine                                 | No effect                  |
| 0128 | Dihydroergotoxine mesylate                | No effect                  |
| 0129 | Emetine dihydrochloride                   | No effect                  |

|      |                                  |            |
|------|----------------------------------|------------|
| 0130 | Ipratropium bromide              | No effect  |
| 0131 | Rauwolscine hydrochloride        | No effect  |
| 0132 | Corynanthine hydrochloride       | No effect  |
| 0133 | Palmatine chloride               | No effect  |
| 0134 | Trimethylcolchicinic acid        | No effect  |
| 0135 | Hydrastine                       | No effect  |
| 0136 | Lobelanidine hydrochloride       | No effect  |
| 0137 | Papaverine hydrochloride         | Activation |
| 0138 | Yohimbine hydrochloride          | No effect  |
| 0139 | Lobeline alpha (-) hydrochloride | No effect  |
| 0140 | Berberine chloride               | Activation |
| 0141 | Galanthamine hydrobromide        | No effect  |
| 0142 | Bicuculline (+)                  | No effect  |
| 0143 | Yohimbinic acid monohydrate      | No effect  |
| 0144 | Laudanosine (R,S)                | No effect  |
| 0145 | Ajmalicine hydrochloride         | No effect  |
| 0146 | Calycanthine                     | No effect  |
| 0147 | Convolamine hydrochloride        | No effect  |
| 0148 | Isocorydine (+)                  | No effect  |
| 0149 | Seneciophylline                  | No effect  |
| 0150 | Boldine                          | No effect  |
| 0151 | Ajmaline                         | No effect  |
| 0152 | Monocrotaline                    | No effect  |
| 0153 | Hydrocotarnine hydrobromide      | No effect  |
| 0154 | (-)-Cinchonidine                 | No effect  |
| 0155 | Eburnamonine (-)                 | No effect  |

|      |                                         |                            |
|------|-----------------------------------------|----------------------------|
| 0156 | Cinchonine                              | No effect                  |
| 0157 | Canavanine sulfate monohydrate<br>(L,+) | No effect                  |
| 0158 | Harmaline hydrochloride dihydrate       | No effect                  |
| 0159 | Harmalol hydrochloride dihydrate        | No effect                  |
| 0160 | Harmol hydrochloride monohydrate        | Inhibition (Confirmed)     |
| 0161 | Harmine hydrochloride                   | Inhibition (Confirmed)     |
| 0162 | Sparteine (-)                           | No effect                  |
| 0163 | Harmane hydrochloride                   | Inhibition (Not confirmed) |
| 0164 | Stachydrine hydrochloride               | No effect                  |
| 0165 | Pseudopelletierine hydrochloride        | No effect                  |
| 0166 | Salsolinol hydrobromide                 | No effect                  |
| 0167 | Gramine                                 | No effect                  |
| 0168 | Thiamine hydrochloride                  | No effect                  |
| 0169 | Riboflavine                             | No effect                  |
| 0170 | Hydroquinine hydrobromide<br>hydrate    | No effect                  |
| 0171 | Retrorsine                              | No effect                  |
| 0172 | Conessine                               | No effect                  |
| 0173 | Protoveratrine A                        | No effect                  |
| 0174 | Solanine alpha                          | No effect                  |
| 0175 | Butirosin disulfate salt                | No effect                  |
| 0176 | Picrotoxinin                            | No effect                  |
| 0177 | Vitexin                                 | No effect                  |
| 0178 | Solasodine                              | No effect                  |
| 0179 | Foliosidine                             | No effect                  |
| 0180 | Skimmianine                             | No effect                  |

|      |                                     |                            |
|------|-------------------------------------|----------------------------|
| 0181 | Tetrandrine                         | No effect                  |
| 0182 | (d,l)-Tetrahydroberberine           | No effect                  |
| 0183 | Deltaline                           | No effect                  |
| 0184 | Graveoline                          | No effect                  |
| 0185 | Hippeastrine hydrobromide           | No effect                  |
| 0186 | Gossypol                            | No effect                  |
| 0187 | Delsoline                           | No effect                  |
| 0188 | Fluorocurarine chloride             | No effect                  |
| 0189 | Austricine hydrate                  | No effect                  |
| 0190 | beta- Belladonnine dichloroethylate | No effect                  |
| 0191 | Heliotrine                          | No effect                  |
| 0192 | Nitrarine dihydrochloride           | No effect                  |
| 0193 | Karakoline                          | No effect                  |
| 0194 | Napelline                           | No effect                  |
| 0195 | Fillalbin                           | No effect                  |
| 0196 | Strophanthidin                      | No effect                  |
| 0197 | Monensin sodium salt                | Inhibition (Not confirmed) |
| 0198 | Mevalonic-D, L acid lactone         | No effect                  |
| 0199 | Podophyllotoxin                     | No effect                  |
| 0200 | Cycloheximide                       | No effect                  |
| 0201 | Bergenin monohydrate                | No effect                  |
| 0202 | Catechin-(+,-) hydrate              | No effect                  |
| 0203 | Aminophylline                       | No effect                  |
| 0204 | Luteolin                            | No effect                  |
| 0205 | Theophylline monohydrate            | No effect                  |
| 0206 | Theobromine                         | No effect                  |

|      |                               |            |
|------|-------------------------------|------------|
| 0207 | Reserpine                     | No effect  |
| 0208 | Arcaïne sulfate               | No effect  |
| 0209 | Scopolamine hydrochloride     | No effect  |
| 0210 | Capsaicin                     | No effect  |
| 0211 | Digoxigenin                   | Activation |
| 0212 | Cantharidin                   | No effect  |
| 0213 | Chrysin                       | No effect  |
| 0214 | Proxiphylline                 | No effect  |
| 0215 | 3-Acetylcoumarin              | No effect  |
| 0216 | Esculin Hydrate               | No effect  |
| 0217 | Caffeic acid                  | No effect  |
| 0218 | Esculetin                     | No effect  |
| 0219 | (±)-Nipecotic acid            | No effect  |
| 0220 | Scopoletin                    | No effect  |
| 0221 | Gibberellic acid              | No effect  |
| 0222 | 6-Hydroxytropinone            | No effect  |
| 0223 | 3-Acetamidocoumarin           | No effect  |
| 0224 | Reserpinic acid hydrochloride | No effect  |
| 0225 | Beta-sistosterol              | No effect  |
| 0226 | Guaiacol                      | No effect  |
| 0227 | Harpagoside                   | No effect  |
| 0228 | Asiaticoside                  | No effect  |
| 0229 | Betulin                       | No effect  |
| 0230 | Arbutin                       | No effect  |
| 0231 | alpha-Santonin                | No effect  |
| 0232 | Tropine                       | No effect  |

|      |                                        |            |
|------|----------------------------------------|------------|
| 0233 | Condelphine                            | No effect  |
| 0234 | Leucomisine                            | No effect  |
| 0235 | (+,-)-Synephrine                       | Activation |
| 0236 | Menaquinone                            | No effect  |
| 0237 | Quinic acid                            | No effect  |
| 0238 | Caffeine                               | No effect  |
| 0245 | 3,3'-methylene-bis(4-hydroxycoumarin)  | No effect  |
| 0247 | 5-methoxy-2-methylfuranochromone       | No effect  |
| 0248 | acide 4-hydroxy-3,5-dimethoxybenzoique | No effect  |
| 0249 | 7-glucosylomb élif érone               | No effect  |
| 0250 | Querc éine-3-rutinoside                | No effect  |
| 0255 | Bakankosine                            | No effect  |
| 0258 | Hordenine                              | No effect  |
| 0259 | Genatropine chlorhydrate               | No effect  |
| 0260 | Narc éine                              | No effect  |
| 0261 | Geneserine                             | No effect  |
| 0262 | Colchicoside                           | No effect  |
| 0263 | Cytisine nitrate hydrate               | No effect  |
| 0264 | Gelsemine                              | No effect  |
| 0265 | 9-Methoxyellipticine                   | No effect  |
| 0266 | Isatine                                | No effect  |
| 0268 | Podocarpic acid                        | No effect  |
| 0270 | Meconic acid                           | No effect  |
| 0271 | Hydrocupreine                          | No effect  |
| 0272 | Securinine                             | No effect  |

|      |                               |                        |
|------|-------------------------------|------------------------|
| 0273 | Ellipticine                   | Inhibition (Confirmed) |
| 0274 | Epicatechin(-)                | No effect              |
| 0275 | Metanephrine hydrochloride DL | Activation             |
| 0276 | Anisic acid                   | No effect              |
| 0277 | Brucine                       | No effect              |
| 0278 | Ephedrine HCl                 | Activation             |
| 0279 | Genoscopolamine HBr           | No effect              |
| 0280 | Hydrocinnamic acid            | No effect              |
| 0281 | Verbenaline                   | No effect              |
| 0282 | Tabersonine dichlorhydrate    | No effect              |
| 0283 | Haplopine                     | No effect              |
| 0284 | Hydroquinidine HCl            | No effect              |
| 0285 | Nicotinic acid                | No effect              |
| 0286 | Tropic acid                   | No effect              |
| 0287 | Genostrychnine base           | No effect              |
| 0288 | Ungerine nitrate              | No effect              |
| 0289 | Sanguinarine                  | No effect              |
| 0291 | Homatropine HBr               | No effect              |
| 0292 | Thebaine HCl                  | No effect              |
| 0293 | Coronaridine                  | No effect              |
| 0294 | Amygdalin                     | No effect              |
| 0295 | Phloridzin                    | No effect              |
| 0296 | Melicopicine                  | No effect              |
| 0297 | Strychnospermine              | No effect              |
| 0298 | Vindoline dichlorhydrate      | No effect              |
| 0299 | Vochysine (4 dia/ énantio)    | No effect              |



|      |                                        |            |
|------|----------------------------------------|------------|
| 0300 | Xanthevodine                           | No effect  |
| 0301 | Veprisine                              | No effect  |
| 0302 | Diosgenin                              | No effect  |
| 0303 | 4,2,4'-Tribenzyloxy-6'-hydroxychalcone | No effect  |
| 0304 | Evoxanthine                            | No effect  |
| 0305 | Oxime de Yohimbinone                   | No effect  |
| 0306 | 10-Methoxy-o-demethylsilanine          | No effect  |
| 0307 | Olivacine                              | No effect  |
| 0308 | Kokusaginine                           | No effect  |
| 0309 | Ethylvanilline                         | No effect  |
| 0310 | Glycyrrhetic Acid                      | No effect  |
| 0311 | Triamcinolone acetonide                | No effect  |
| 0312 | 2-hydroxy-3-methoxy-naphtoquinone      | No effect  |
| 0314 | Ergotamine tartrate                    | No effect  |
| 0316 | (-)-Quinpirole hydrochloride           | No effect  |
| 0317 | Delcorine                              | No effect  |
| 0318 | Cotarnine chloride                     | No effect  |
| 0319 | Quinine dihydrochloride                | No effect  |
| 0321 | Gitoxin                                | Activation |
| 0322 | Cryptopine                             | No effect  |
| 0323 | Triamcinolone alcohol                  | No effect  |
| 0324 | Isoconessimine                         | No effect  |
| 0325 | Kainic acid                            | No effect  |
| 0326 | Veratrine                              | No effect  |
| 0327 | Adenosine                              | No effect  |

|      |                                                                                                                                                             |            |
|------|-------------------------------------------------------------------------------------------------------------------------------------------------------------|------------|
| 0328 | Nicotinamide                                                                                                                                                | No effect  |
| 0329 | Ergobasine                                                                                                                                                  | Activation |
| 0330 | Khelline                                                                                                                                                    | No effect  |
| 0331 | Chelidonic acid                                                                                                                                             | No effect  |
| 0332 | L-tryptophane                                                                                                                                               | No effect  |
| 0334 | Desoxypeganine Hydrochloride                                                                                                                                | No effect  |
| 0335 | Glycyrrhizic acid                                                                                                                                           | No effect  |
| 0337 | L-Proline                                                                                                                                                   | No effect  |
| 0338 | L-Methionine                                                                                                                                                | No effect  |
| 0339 | L-menthol                                                                                                                                                   | No effect  |
| 0340 | Tyramin hydrochloride                                                                                                                                       | No effect  |
| 0341 | Cytosine                                                                                                                                                    | No effect  |
| 0342 | Ergosterine                                                                                                                                                 | No effect  |
| 0343 | Trichodesmine                                                                                                                                               | No effect  |
| 0344 | Vulpinic acid                                                                                                                                               | No effect  |
| 0345 | Atranorin                                                                                                                                                   | No effect  |
| 0346 | (1'S,3S,4a'S,5a'R,10a'S)-methyl 6-methoxy-1'-methyl-2-oxo-1',4a',5',5a',7',8',10',10a'-octahydrospiro[indoline-3,6'-pyrano[3,4-f]indolizine]-4'-carboxylate | No effect  |
| 0347 | Variolaric acid                                                                                                                                             | No effect  |
| 0348 | (+)-Usnic acid                                                                                                                                              | No effect  |
| 0349 | Imperialine                                                                                                                                                 | No effect  |
| 0350 | Berberamine dihydrochloride                                                                                                                                 | No effect  |
| 0351 | Cytidine                                                                                                                                                    | No effect  |
